# Supplementary material for: Mapping Chilean clinical research: a protocol for a scoping review and multiple evidence gap maps
Source: HighWire-hosted journal article supplement (doi:10.1136/bmjopen-2021-057555), 2022-06-01
Supplement: bmjopen-2021-057555supp001_data_supplement.pdf [file bmjopen-2021-057555supp001_data_supplement.pdf]

## Appendix A. Search strategy for a scoping review protocol for trends in Chilean clinical research

### MEDLINE Ovid search strategy

Ovid MEDLINE(R) and Epub Ahead of Print, In-Process, In-Data-Review & Other Non-Indexed Citations, Daily and Versions(R) <1946 to June 17, 2021>

|     |                                                                                                                                                                                                                                                                         |
|-----|-------------------------------------------------------------------------------------------------------------------------------------------------------------------------------------------------------------------------------------------------------------------------|
| #1  | Chile.ia,in.                                                                                                                                                                                                                                                            |
| #2  | exp Chile/                                                                                                                                                                                                                                                              |
| #3  | ((Hospital or Clinic* or funda* or universi*) adj3 (Arica or Tarapaca or Antofagasta or Atacama or Coquimbo or Valparaiso or "Metropolitana de Santiago" or O Higgins or Maule or nuble or Biobio or Araucania or Los Rios or Los Lagos or Aysen or Magallanes)).ia,in. |
| #4  | 1 or 2 or 3                                                                                                                                                                                                                                                             |
| #5  | randomized controlled trial.pt.                                                                                                                                                                                                                                         |
| #6  | controlled clinical trial.pt.                                                                                                                                                                                                                                           |
| #7  | randomized.ab.                                                                                                                                                                                                                                                          |
| #8  | placebo.ab.                                                                                                                                                                                                                                                             |
| #9  | drug therapy.fs.                                                                                                                                                                                                                                                        |
| #10 | randomly.ab.                                                                                                                                                                                                                                                            |
| #11 | trial.ab.                                                                                                                                                                                                                                                               |
| #12 | groups.ab.                                                                                                                                                                                                                                                              |
| #13 | 5 or 6 or 7 or 8 or 9 or 10 or 11 or 12                                                                                                                                                                                                                                 |
| #14 | exp animals/ not humans.sh.                                                                                                                                                                                                                                             |
| #15 | 13 not 14                                                                                                                                                                                                                                                               |
| #16 | 4 and 15                                                                                                                                                                                                                                                                |
| #17 | Meta-Analysis as Topic/                                                                                                                                                                                                                                                 |
| #18 | meta analy\$.tw.                                                                                                                                                                                                                                                        |
| #19 | metaanaly\$.tw.                                                                                                                                                                                                                                                         |

|     |                                                 |
|-----|-------------------------------------------------|
| #20 | Meta-Analysis/                                  |
| #21 | (systematic adj (review\$1 or overview\$1)).tw. |
| #22 | exp Review Literature as Topic/                 |
| #23 | 17 or 18 or 19 or 20 or 21 or 22                |
| #24 | cochrane.ab.                                    |
| #25 | embase.ab.                                      |
| #26 | (psychlit or psyclit).ab.                       |
| #27 | (psychinfo or psycinfo).ab.                     |
| #28 | (cinahl or cinhal).ab.                          |
| #29 | science citation index.ab.                      |
| #30 | bids.ab.                                        |
| #31 | cancerlit.ab.                                   |
| #32 | 24 or 25 or 16 or 27 or 28 or 29 or 30 or 31    |
| #33 | reference list\$.ab.                            |
| #34 | bibliograph\$.ab.                               |
| #35 | hand-search\$.ab.                               |
| #36 | relevant journals.ab.                           |
| #37 | manual search\$.ab.                             |
| #38 | 33 or 34 or 35 or 36 or 37                      |
| #39 | selection criteria.ab.                          |
| #40 | data extraction.ab.                             |
| #41 | 39 or 40                                        |
| #42 | Review/                                         |
| #43 | 41 and 42                                       |
| #44 | Comment/                                        |
| #45 | Letter/                                         |

|     |                            |
|-----|----------------------------|
| #46 | Editorial/                 |
| #47 | animal/                    |
| #48 | human/                     |
| #49 | 47 not (47 and 48)         |
| #50 | 44 or 45 or 46 or 49       |
| #51 | 23 or 32 or 38 or 43 or 50 |
| #52 | 4 and 51                   |
| #53 | 16 or 52                   |
| #54 | limit 53 to yr=2000-2021   |

|     |                                                                                                                                                                                                                                                                         |
|-----|-------------------------------------------------------------------------------------------------------------------------------------------------------------------------------------------------------------------------------------------------------------------------|
| #1  | exp cohort studies/                                                                                                                                                                                                                                                     |
| #2  | cohort\$.tw.                                                                                                                                                                                                                                                            |
| #3  | exp Observational Study/                                                                                                                                                                                                                                                |
| #4  | observational.ab,ti.                                                                                                                                                                                                                                                    |
| #5  | exp Cross-Sectional Studies/                                                                                                                                                                                                                                            |
| #6  | Prevalence Stud*.ti,ab.                                                                                                                                                                                                                                                 |
| #7  | Cross Sectional*.ti,ab.                                                                                                                                                                                                                                                 |
| #8  | descriptive.mp.                                                                                                                                                                                                                                                         |
| #9  | Case.ti,ab. AND (report*.ti,ab. OR case serie*.ti,ab.)                                                                                                                                                                                                                  |
| #10 | exp Diagnosis/                                                                                                                                                                                                                                                          |
| #11 | Diagnos.ti,ab                                                                                                                                                                                                                                                           |
| #12 | 1 or 2 or 3 or 4 or 5 or 6 or 7 or 8 or 9 or 10 or 11 or 12                                                                                                                                                                                                             |
| #13 | Chile.ia,in.                                                                                                                                                                                                                                                            |
| #14 | exp Chile/                                                                                                                                                                                                                                                              |
| #15 | ((Hospital or Clinic* or funda* or universi*) adj3 (Arica or Tarapaca or Antofagasta or Atacama or Coquimbo or Valparaiso or "Metropolitana de Santiago" or O Higgins or Maule or nuble or Biobio or Araucania or Los Rios or Los Lagos or Aysen or Magallanes)).ia,in. |

|     |                          |
|-----|--------------------------|
| #16 | 13 or 14 or 15           |
| #17 | 12 and 16                |
| #18 | limit 17 to yr=2000-2021 |

## Appendix B. Data sources for complimentary hand search strategy.

- 1) ANID repository (<http://repositorio.conicyt.cl/>). Repository of the National Agency for Research and Development that contains research and innovation projects financed by this agency.
- 2) SciELO (<https://scielo.org/es/>). Scielo contains the full texts of Chilean Open Access scientific journals, from all areas of knowledge, including peer-reviewed scientific research.
- 3) Bibliographic catalogues of the Chilean universities and DIBAM (<http://www.bncatalogo.gob.cl>). This is a unified catalogue of all public institutions in Chile (public libraries, archives and museums) that includes bibliographic information on all national print journals.
- 4) Bibliographic and National Repository of the Ministry of Health of Chile (<http://www.repositoriodigital.minsal.cl/>). It contains all the research developed by the Ministry, including clinical practice guidelines, primary studies, population statistics, and other documents.
- 5) Directory of Open Access Journals (<https://doaj.org/>). Independent index containing peer-reviewed open access journals.
- 6) Latin American Repositories Network (<http://repositorioslatinoamericanos.uchile.cl>). Provides access to full-text electronic publications located in different repositories in Latin American countries.
- 7) Portal of academic journals of the Universidad de Chile (<https://revistas.uchile.cl/>); Chilean Academic Journals provides open access to more than 300 publications published by universities, scientific societies, government agencies and Non-Government Organisations.
- 8) Google Scholar (<https://scholar.google.com/>).
- 9) PROSPERO (<https://www.crd.york.ac.uk/prospero/>).
- 10) World Health Organization International Clinical Trials Registry Platform (ICTRP, [www.who.int/trialsearch/](http://www.who.int/trialsearch/)).
- 11) ClinicalTrials.gov (<http://clinicaltrials.gov>)

## Appendix C. Potentially eligible and excluded conditions/programs from the General Regime of the Health Guarantees Act (*Garantías Explícitas en Salud*, GES).

**Appendix C.1.** Potentially eligible conditions from GES, in descending order according to Global Burden of Disease 2019 (GBD 2019) Disability-Adjusted Life Years (DALYs).

| GES condition                                    | Matching GBD 2019 cause (age groups) | DALYs, number (CI%95, upper to lower)                         |
|--------------------------------------------------|--------------------------------------|---------------------------------------------------------------|
| Myocardial infarction                            | Ischemic heart disease (all ages)    | 214819.57<br>(227068.320701352 to 0)                          |
| Type 2 diabetes                                  | Diabetes mellitus type 2 (all ages)  | 170569.880724338<br>(213283.001985072 to 0.192722088496509)   |
| Depression in people aged 15 years and over      | Depressive disorders (20 plus)       | 121414.377867517<br>(169061.491027657 to 2.2253601218192E-06) |
| Chronic kidney disease stage 4 and 6             | Chronic kidney disease (all ages)    | 101733.722907926<br>(110880.123710307 to 208.525669506703)    |
| Ischemic stroke in people aged 15 years and over | Ischemic stroke (20 plus)            | 100161.760973747<br>(109460.558336013 to 94.57213560342)      |
| Stomach cancer                                   | Stomach cancer (all ages)            | 85929.065773134<br>(91647.4644054603 to 0)                    |

|                                                                                                         |                                                                          |                                                                   |
|---------------------------------------------------------------------------------------------------------|--------------------------------------------------------------------------|-------------------------------------------------------------------|
|                                                                                                         |                                                                          | 1.26268744062835)                                                 |
| Lung cancer                                                                                             | Tracheal, bronchus, and lung cancer (all ages)                           | 83674.4888793253<br>(88943.9075435297 to<br>0.000258752006588802) |
| Chronic obstructive pulmonary disease (outpatient management)                                           | Chronic obstructive pulmonary disease (all ages)                         | 83190.7630904602<br>(96438.3426616626 to<br>0.000164947566358871) |
| Alzheimer's disease and other dementias                                                                 | Alzheimer's disease and other dementias (all ages)                       | 72825.9715672292<br>(154958.475973897 to<br>4.10904084133898)     |
| Colorectal cancer in people aged 15 years and over                                                      | Colon and rectum cancer (20 plus)                                        | 70756.6453332632<br>(75584.7656820732 to<br>1.65874626595222)     |
| Hip and/or knee osteoarthritis, mild or moderate, in people aged 55 years and over (medical management) | Osteoarthritis (55 plus)                                                 | 55576.8772705614<br>(112169.901045112 to<br>1.84635512150662)     |
| Prevention of preterm birth                                                                             | Neonatal preterm birth (all ages)                                        | 51479.7300991547<br>(63435.89308863 to<br>0.158666035639263)      |
| Chronic hepatitis C                                                                                     | Cirrhosis and other chronic liver diseases due to hepatitis C (all ages) | 50969.2141174526<br>(65323.6655151894 to<br>0.000549020300847728) |
| Breast cancer in people aged 15 years and over                                                          | Breast cancer (20 plus)                                                  | 47006.5369289545<br>(51554.507927785 to<br>16.1265082764972)      |
| Prostate cancer in people aged 15 years and over                                                        | Prostate cancer (20 plus)                                                | 45854.8719687154<br>(54664.4754416884 to<br>2.59747447089968)     |
| Schizophrenia                                                                                           | Schizophrenia (all ages)                                                 | 42501.3194923616                                                  |

|                                                                                       |                                               |                                                                |
|---------------------------------------------------------------------------------------|-----------------------------------------------|----------------------------------------------------------------|
|                                                                                       |                                               | (56297.8169798092 to 0.240749074074181)                        |
| Bipolar disorder in people aged 15 years and over                                     | Bipolar disorder (20 plus)                    | 38096.1151342666<br>(58487.7573236035 to 8.43274832801397E-06) |
| Community-acquired pneumonia in people aged 65 years and over (outpatient management) | Lower respiratory infections (65 to 89 years) | 34844.453660895<br>(38946.6963391689 to 1.10402107319051)      |
| Asthma in people aged 15 years and over                                               | Asthma (20 plus)                              | 32694.2377867036<br>(45713.8574539779 to 0.116280132000234)    |
| Secondary subarachnoid hemorrhage to rupture of brain aneurysms                       | Subarachnoid hemorrhage (all ages)            | 28635.4404153411<br>(31612.3869284669 to 1089.40824984095)     |
| Human Immunodeficiency Virus and Acquired Immunodeficiency Syndrome (HIV/AIDS)        | HIV/AIDS (all ages)                           | 27181.8681774182<br>(32191.0340641685 to 29.3017079071855)     |
| Cervical cancer                                                                       | Cervical cancer (all ages)                    | 25200.4297936711<br>(30005.252368359 to 0.000474071744494449)  |
| Non-refractory epilepsy in people aged 15 years and older                             | Idiopathic epilepsy (20 plus)                 | 24620.5412700062<br>(41485.3459737919 to 3501.83306715692)     |
| Kidney cancer in people aged 15 years and older                                       | Kidney cancer (20 plus)                       | 23991.4065239036<br>(26418.6543665931 to 534.114744605753)     |
| Leukemia in people aged 15 years and older                                            | Leukemia (20 plus)                            | 21325.5560639148<br>(22901.6129356555 to 0.000813097105958376) |



|                                                                                                                         |                                                                          |                                                                    |
|-------------------------------------------------------------------------------------------------------------------------|--------------------------------------------------------------------------|--------------------------------------------------------------------|
| Parkinson's disease                                                                                                     | Parkinson's disease (all ages)                                           | 20331.9233118182<br>(22034.4067968826 to<br>147.770845873412)      |
| Operable congenital heart defect in people younger than 15 years                                                        | Congenital heart anomalies (0 to 14)                                     | 15978.961606000155<br>(22470.79582735375 to<br>10367.285436039341) |
| Epithelial ovarian cancer                                                                                               | Ovarian cancer (20 plus)                                                 | 15600.3173555778<br>(17963.5312380173 to<br>1407.16245468356)      |
| Rheumatoid arthritis                                                                                                    | Rheumatoid arthritis (all ages)                                          | 14399.6554552725<br>(18512.9913244069 to<br>0.00362617834828417)   |
| Primary tumors of the central nervous system in people aged 15 years and older                                          | Brain and central nervous system cancer (20 plus)                        | 14245.6107807219<br>(16062.6268023673 to<br>133.432208773944)      |
| Multiple myeloma in people aged 15 years and older                                                                      | Multiple myeloma (20 plus)                                               | 13895.9089272371<br>(15829.801624441 to<br>9.75441705033119)       |
| Chronic hepatitis due to hepatitis B virus                                                                              | Cirrhosis and other chronic liver diseases due to hepatitis B (all ages) | 13680.7698238002<br>(19065.5815024126 to<br>0.0085089965860338)    |
| Bladder cancer in people aged 15 years and older                                                                        | Bladder cancer (20 plus)                                                 | 12707.3764274785<br>(14072.9882127301 to<br>3054.38153002352)      |
| Cancer in children under the age of 15 years                                                                            | Neoplasms (0 to 14)                                                      | 12303.3788104734<br>(14469.5035669086 to<br>113.905690992672)      |
| Total hip endoprosthesis for people aged 65 years and older and arthrosis of the hip with severe functional limitations | Osteoarthritis hand (65 to 89 years)                                     | 10568.6092353729<br>(21500.8167895118 to 0)                        |

|                                                                                                                       |                                                           |                                                                  |
|-----------------------------------------------------------------------------------------------------------------------|-----------------------------------------------------------|------------------------------------------------------------------|
| Cataract surgery                                                                                                      | Cataract (all ages)                                       | 9770.85045117638<br>(13317.247585107 to<br>3232.36904442194)     |
| Moderate and acute bronchial asthma<br>in children under the age of 15 years                                          | Asthma (0 to 14)                                          | 7963.77834457529<br>(13656.3525907285 to<br>51.6514027019469)    |
| Type I diabetes mellitus                                                                                              | Diabetes mellitus type 1 (all ages)                       | 7429.36242517253<br>(9651.21392599779 to 0)                      |
| Testicular cancer in people aged 15<br>years and older                                                                | Testicular cancer (20 plus)                               | 6425.06386606812<br>(7673.24210673214 to 0)                      |
| Refractory epilepsy in children between<br>the ages of 1 and 15 years                                                 | Idiopathic epilepsy (0 to 14)                             | 5569.06914520869<br>(11130.3966112371 to<br>105.052591863323)    |
| Heavy consumption or low to moderate<br>risk of addiction to alcohol and drugs in<br>people under the age of 20 years | Substance use disorders (<20 years)                       | 5312.55244366324<br>(7461.50867463031 to<br>698.314690531639)    |
| Treatment for the eradication of<br><i>Helicobacter pylori</i>                                                        | Gastritis and duodenitis (all ages)                       | 3833.44230358697<br>(5407.26107597058 to<br>31.0664601228219)    |
| Differentiated and medullary thyroid<br>cancer in people aged 15 years and<br>older                                   | Thyroid cancer (20 plus)                                  | 3524.95356842812<br>(3925.21814487822 to 0)                      |
| Treatment for benign prostatic<br>hyperplasia in symptomatic people                                                   | Benign prostatic hyperplasia (all ages)                   | 3136.15726142161<br>(4876.83538193793 to<br>0.00194715937414714) |
| Surgical treatment for chronic lesions of<br>the mitral and tricuspid valves in people<br>aged 15 years and older     | Non-rheumatic degenerative mitral valve disease (20 plus) | 2321.91890136389<br>(2772.42279203503 to<br>0.00640083277215629) |
| Refractive errors in people aged 65                                                                                   | Refraction disorders (65 to 89 years)                     | 2267.63302256029                                                 |

|                                                                                                              |                                             |                                                                   |
|--------------------------------------------------------------------------------------------------------------|---------------------------------------------|-------------------------------------------------------------------|
| years and older                                                                                              |                                             | (3291.72011313406 to<br>4699.20120851181)                         |
| Relapsing-remitting multiple sclerosis                                                                       | Multiple sclerosis (all ages)               | 2192.67301330785<br>(2860.98207134884 to<br>0.000916848432839514) |
| Cholecystectomy for the prevention of<br>gallbladder cancer in people between<br>the ages of 35 and 49 years | Gallbladder and biliary diseases (25 to 49) | 2061.70765625961<br>(2857.83007158215 to<br>7.89297979047496)     |
| Outpatient care for Acute Respiratory<br>Infection (ARI) in children under the age<br>of 5 years             | Upper respiratory infections (under 5)      | 1783.98509162834<br>(2869.84870415435 to<br>53.7737581195539)     |
| Cleft lip and palate                                                                                         | Orofacial clefts (0 to 14)                  | 66.8835836316003<br>(109.496663940256 to<br>17707.9341422313)     |

**Appendix C.2.** Excluded GES conditions

| GES condition                                                                   | Reason for exclusion                                              |
|---------------------------------------------------------------------------------|-------------------------------------------------------------------|
| Primary or essential arterial hypertension in people aged 15 years and older    | Matching condition not found in GBD 2019 data                     |
| Hemophilia                                                                      | Matching condition not found in GBD 2019 data                     |
| Cystic fibrosis                                                                 | Matching condition not found in GBD 2019 data                     |
| Juvenile idiopathic arthritis                                                   | Matching condition not found in GBD 2019 data                     |
| Hypothyroidism in people aged 15 years and older                                | Matching condition not found in GBD 2019 data.                    |
| Systemic lupus erythematosus                                                    | Matching condition not found in GBD 2019 data                     |
| Bilateral hearing loss in people aged 65 years and older requiring hearing aids | Matching condition not found in GBD 2019 data                     |
| Diabetic retinopathy                                                            | Matching condition not found in GBD 2019 data                     |
| Nontraumatic rhegmatogenous retinal detachment                                  | Matching condition not found in GBD 2019 data                     |
| Scoliosis surgery for people under the age of 25 years                          | Matching condition not found in GBD 2019 data                     |
| Osteosarcoma in people aged 15 years and older                                  | Matching condition not found in GBD 2019 data                     |
| Strabismus in children under the age of 9 years                                 | Matching condition not found in GBD 2019 data                     |
| Hip dysplasia                                                                   | Matching condition not found in GBD 2019 data                     |
| Treatment for moderate, severe and profound hearing loss in children under four | Matching condition not found in GBD 2019 data                     |
| Serious polytrauma                                                              | GES condition does not match with a unique cause in GBD 2019 data |
| Lymphomas in people aged 15 years and older                                     | GES condition does not match with a unique cause in GBD 2019 data |

|                                                                                             |                                               |
|---------------------------------------------------------------------------------------------|-----------------------------------------------|
| Spinal dysraphism                                                                           | Matching condition not found in GBD 2019 data |
| Surgical treatment of chronic lesions of the aortic valve in people aged 15 years and older | Matching condition not found in GBD 2019 data |
| Surgery for herniated nucleus pulposus                                                      | Matching condition not found in GBD 2019 data |
| Severe burns                                                                                | Matching condition not found in GBD 2019 data |
| Serious eye trauma                                                                          | Matching condition not found in GBD 2019 data |
| Impulse and conduction disorders in people aged 15 years and older who require a pacemaker  | Matching condition not found in GBD 2019 data |
| Respiratory distress syndrome in the newborn                                                | Matching condition not found in GBD 2019 data |
| Bilateral sensorineural hearing loss in premature babies                                    | Matching condition not found in GBD 2019 data |
| Bronchopulmonary dysplasia in premature babies                                              | Matching condition not found in GBD 2019 data |
| Retinopathy in premature babies                                                             | Matching condition not found in GBD 2019 data |
| Moderate and serious traumatic brain injury                                                 | Matching condition not found in GBD 2019 data |

### Appendix C.3. Excluded GES programs

|                                                                 |
|-----------------------------------------------------------------|
| Orthosis (or technical help) for people aged 65 years and older |
| Pain relief and palliative care for advanced cancer             |
| Analgesia in childbirth                                         |
| Integral dental health care for girls and boys aged 6 years old |
| Outpatient treatment for odontological emergencies              |
| Integral dental health care for 60 year old adults              |
| Integral dental health care for pregnant women                  |
| Secondary prevention of end-stage chronic kidney disease        |
